# Supplementary material for: Developing a risk stratification tool for predicting opioid-related respiratory depression after non-cardiac surgery: a retrospective study
Source: HighWire-hosted journal article supplement (doi:10.1136/bmjopen-2022-064089), 2022-09-01
Supplement: bmjopen-2022-064089supp001_data_supplement.pdf [file bmjopen-2022-064089supp001_data_supplement.pdf]

**Supplemental Table 1.** List of non-opioid and opioid based medications identified and accounted for in the study.

| <b>Medication name in the electronic health record</b> | <b>Type of medication</b> |
|--------------------------------------------------------|---------------------------|
| asa                                                    | non-opioid                |
| acephen                                                | non-opioid                |
| acetaminophen                                          | non-opioid                |
| tylenol                                                | non-opioid                |
| ibuprofen                                              | non-opioid                |
| naproxen                                               | non-opioid                |
| acetylsalicylic acid                                   | non-opioid                |
| actamin                                                | non-opioid                |
| acuflex                                                | non-opioid                |
| acular                                                 | non-opioid                |
| aspirin                                                | non-opioid                |
| advil                                                  | non-opioid                |
| aflaxen                                                | non-opioid                |
| anaprox                                                | non-opioid                |
| arthrotec                                              | non-opioid                |
| ascriptin                                              | non-opioid                |
| aspir                                                  | non-opioid                |
| bufferin                                               | non-opioid                |
| cafgesic                                               | non-opioid                |
| cataflam                                               | non-opioid                |
| celebrex                                               | non-opioid                |
| celecoxib                                              | non-opioid                |
| clinoril                                               | non-opioid                |
| datril                                                 | non-opioid                |
| diclofenac                                             | non-opioid                |
| diclo                                                  | non-opioid                |
| diflunisal                                             | non-opioid                |
| dolobid                                                | non-opioid                |
| duexis                                                 | non-opioid                |
| naprosyn                                               | non-opioid                |
| etodalac                                               | non-opioid                |
| fasprin                                                | non-opioid                |
| feldene                                                | non-opioid                |
| feverall                                               | non-opioid                |
| flexin                                                 | non-opioid                |
| genapap                                                | non-opioid                |

|                                    |            |
|------------------------------------|------------|
| genebs                             | non-opioid |
| halfprin                           | non-opioid |
| indocin                            | non-opioid |
| indomethacin                       | non-opioid |
| ketoprofen                         | non-opioid |
| ketorolac                          | non-opioid |
| lofensaid                          | non-opioid |
| mapap                              | non-opioid |
| meclofenamate                      | non-opioid |
| mejoralito                         | non-opioid |
| midol                              | non-opioid |
| miniprin                           | non-opioid |
| mobic                              | non-opioid |
| motrin                             | non-opioid |
| nabumeton                          | non-opioid |
| nabumetone                         | non-opioid |
| naprelan                           | non-opioid |
| naprosyn                           | non-opioid |
| neoprofen                          | non-opioid |
| nsaid                              | non-opioid |
| nonsteroidal antiinflammatory drug | non-opioid |
| norgesic                           | non-opioid |
| tolmetin                           | non-opioid |
| ofirmev                            | non-opioid |
| orudis                             | non-opioid |
| oruvail                            | non-opioid |
| oxaprozin                          | non-opioid |
| panadol                            | non-opioid |
| paracetamol                        | non-opioid |
| piroxicam                          | non-opioid |
| proflex                            | non-opioid |
| relafen                            | non-opioid |
| salsalate                          | non-opioid |
| voltaren                           | non-opioid |
| solaraze                           | non-opioid |
| sprix                              | non-opioid |
| sulin                              | non-opioid |
| sulindac                           | non-opioid |
| talacen                            | non-opioid |
| tempra                             | non-opioid |

|                                          |            |
|------------------------------------------|------------|
| tivorbex                                 | non-opioid |
| tolmetin                                 | non-opioid |
| toradol                                  | non-opioid |
| vimovo                                   | non-opioid |
| vistra                                   | non-opioid |
| voltaren                                 | non-opioid |
| zipsor                                   | non-opioid |
| zorvolex                                 | non-opioid |
| apap                                     | non-opioid |
| etodolac                                 | non-opioid |
| asprin                                   | non-opioid |
| etodolac er                              | non-opioid |
| acetaminophen                            | non-opioid |
| ibu                                      | non-opioid |
| ibu - 200                                | non-opioid |
| indometacin                              | non-opioid |
| non - steroidal anti - inflammatory drug | non-opioid |
| bayer back and body pain                 | non-opioid |
| etodolac 400mg                           | non-opioid |
| etodolac 500 mg tablet                   | non-opioid |
| nonsteroidal antiinflammatory agent      | non-opioid |
| etodolac 400 mg                          | non-opioid |
| ibuprohm                                 | non-opioid |
| hydromorphone                            | opioid     |
| percocet                                 | opioid     |
| demerol                                  | opioid     |
| hydrocodone                              | opioid     |
| morphine                                 | opioid     |
| fentanyl                                 | opioid     |
| oxycodone                                | opioid     |
| loratab                                  | opioid     |
| darvocet                                 | opioid     |
| abstral                                  | opioid     |
| codeine                                  | opioid     |
| dihydrocodeine                           | opioid     |
| propoxyphene                             | opioid     |
| tramadol                                 | opioid     |
| balacet                                  | opioid     |
| lorcet                                   | opioid     |

|             |        |
|-------------|--------|
| maxidone    | opioid |
| norco       | opioid |
| roxicet     | opioid |
| tylox       | opioid |
| ultracet    | opioid |
| ultram      | opioid |
| vicodin     | opioid |
| zamicet     | opioid |
| actiq       | opioid |
| anexsia     | opioid |
| avinza      | opioid |
| bitex       | opioid |
| brontex     | opioid |
| combunox    | opioid |
| contin      | opioid |
| meperidine  | opioid |
| darvon      | opioid |
| dilaudid    | opioid |
| duragesic   | opioid |
| duramorph   | opioid |
| embeda      | opioid |
| endal       | opioid |
| endocet     | opioid |
| exalgo      | opioid |
| fentora     | opioid |
| methadone   | opioid |
| hycet       | opioid |
| hycodan     | opioid |
| hycomine    | opioid |
| hydroc0done | opioid |
| hydromet    | opioid |
| ibudone     | opioid |
| vicoprofen  | opioid |
| infumorph   | opioid |
| kadian      | opioid |
| maxidone    | opioid |
| meperitab   | opioid |
| oramorph    | opioid |
| opana       | opioid |
| oxy ir      | opioid |

|               |        |
|---------------|--------|
| oxycontin     | opioid |
| oxyfast       | opioid |
| oxymorphone   | opioid |
| palladone     | opioid |
| panasal       | opioid |
| pentazocine   | opioid |
| phenylhistine | opioid |
| primalev      | opioid |
| primlev       | opioid |
| propacet      | opioid |
| propoxyphene  | opioid |
| protex        | opioid |
| remifentanyl  | opioid |
| reprexain     | opioid |
| rezira        | opioid |
| roxanol       | opioid |
| roxicet       | opioid |
| roxicodone    | opioid |
| stagesic      | opioid |
| sublimaze     | opioid |
| subsys        | opioid |
| synalgos      | opioid |
| trezix        | opioid |
| triant        | opioid |
| tussicaps     | opioid |
| tussigon      | opioid |
| tussionex     | opioid |
| vituz         | opioid |
| xodol         | opioid |
| zamicet       | opioid |
| zolvit        | opioid |
| zomig         | opioid |
| zutripro      | opioid |
| zydone        | opioid |
| mar - cof cg  | opioid |
| dolophine     | opioid |
| phentanyl     | opioid |
| hydrocodon    | opioid |
| eth - oxydose | opioid |
| ms-ir 15mg    | opioid |

|              |        |
|--------------|--------|
| methadose    | opioid |
| ms 54        | opioid |
| tyl # 3      | opioid |
| oxydose      | opioid |
| hydromorphon | opioid |
| morphia      | opioid |
| xolox        | opioid |
| astramorph   | opioid |
| oxycone      | opioid |
| morph        | opioid |
| duromorph    | opioid |
| co - gestic  | opioid |
| kgs hc       | opioid |
